# Supplementary material for: Synthesis, Characterization and Kinetic Behavior of Supported Cobalt Catalysts for Oxidative after-Treatment of Methane Lean Mixtures
Source: MDPI journal article supplement (doi:10.3390/ma12193174), 2019-09-27
Supplement: s1 [file s1]

# Supplementary Materials: Synthesis, Characterization and Kinetic Behavior of Supported Cobalt Catalysts for Oxidative After-Treatment of Methane Lean Mixtures

Andoni Choya, Beatriz de Rivas, Jose Ignacio Gutiérrez-Ortiz, Juan Ramón González-Velasco and Rubén López-Fonseca \*

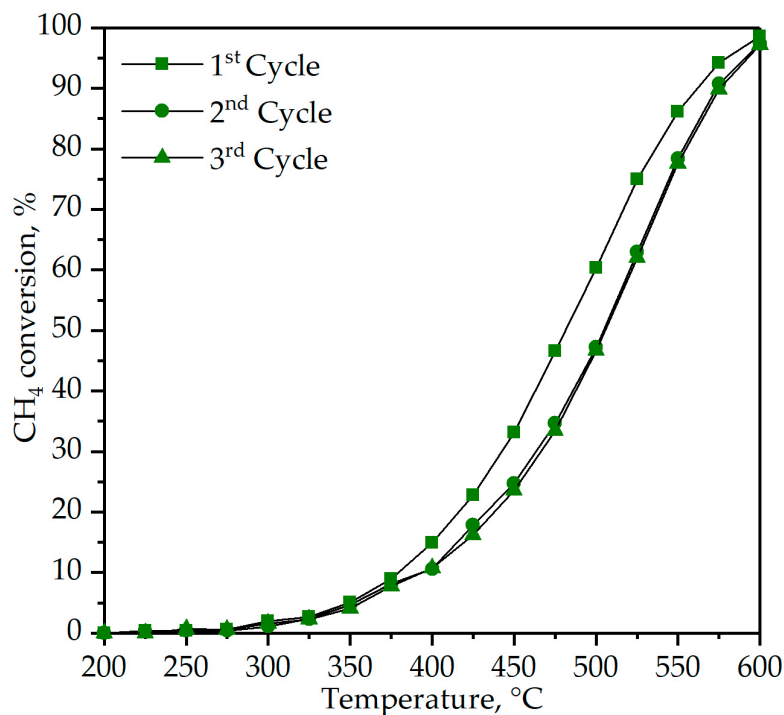

Figure S1. Light-off cycles of the Co/CeO<sub>2</sub> catalyst.

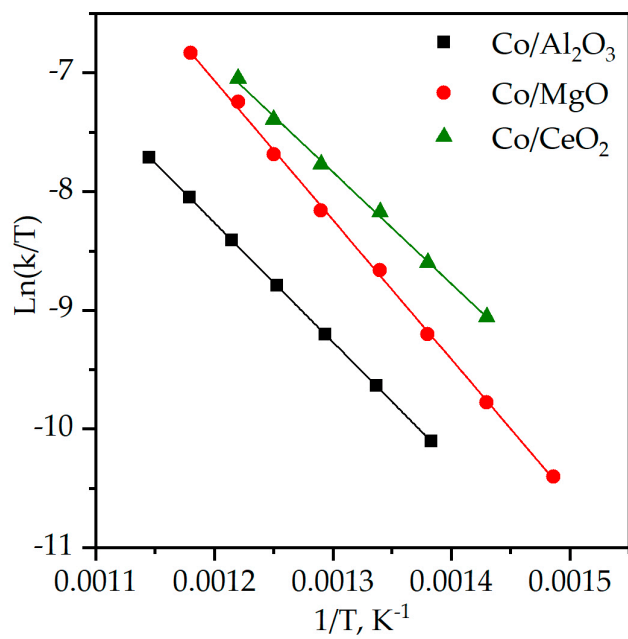

**Figure S2.** Linearized plots of the Eyring-Polanyi equation.
